# Supplementary material for: Presynaptic CK2 promotes synapse organization and stability by targeting Ankyrin2
Source: PubMed Central journal article supplement — J Cell Biol. 2014 Jan 6;204(1):77–94. doi: 10.1083/jcb.201305134 (PMC3882785; doi:10.1083/jcb.201305134), 2014-01-06
Supplement: supp_jcb.201305134_JCB_201305134_TableS2.pdf [file supp_jcb.201305134_JCB_201305134_TableS2.pdf]

Table S2. **Complete data of all experiments displayed in Figs. 1–8 and Figs. S1–4**  
**Data for Fig. 1 and Figs. S1 and S2**

| Target gene<br>RNAi ID | Retraction frequency (%) |                         |            |                         |            |                         | n  |
|------------------------|--------------------------|-------------------------|------------|-------------------------|------------|-------------------------|----|
|                        | m1/9<br>2/10             | P vs. cntr              | m6/7       | P vs. cntr              | m4         | P vs. cntr              |    |
| Control                | 1.0 ± 0.7                |                         | 2.1 ± 1.4  |                         | 2.1 ± 1.4  |                         | 12 |
| CK2β                   | 51.4 ± 4.0               | 1.69 × 10 <sup>-6</sup> | 20.8 ± 6.6 | 0.021279                | 18.3 ± 5.6 | 0.012127                | 9  |
| VDR32377               |                          |                         |            |                         |            |                         |    |
| PP2A-29B <sup>1</sup>  | 48.7 ± 3.9               | 1.05 × 10 <sup>-8</sup> | 64.3 ± 5.2 | 7.62 × 10 <sup>-9</sup> | 56.7 ± 3.9 | 1.21 × 10 <sup>-9</sup> | 14 |
| VDR49671               |                          |                         |            |                         |            |                         |    |
| PP2A-29B <sup>2</sup>  | 40.0 ± 5.6               | 7.1 × 10 <sup>-5</sup>  | 47.1 ± 7.8 | 7.27 × 10 <sup>-5</sup> | 27.9 ± 5.1 | 0.000258                | 10 |
| BL29384                |                          |                         |            |                         |            |                         |    |
| IPP CG9784             | 35.6 ± 7.3               | 0.001135                | 25.0 ± 7.9 | 0.01713                 | 16.3 ± 4.6 | 0.013086                | 10 |
| VDCR30098              |                          |                         |            |                         |            |                         |    |
| CKIα <sup>1</sup>      | 33.3 ± 4.9               | 4.65 × 10 <sup>-5</sup> | 19.4 ± 4.7 | 0.006391                | 27.8 ± 6.2 | 0.002846                | 12 |
| VDR13664               |                          |                         |            |                         |            |                         |    |
| CKIα <sup>2</sup>      | 25.0 ± 3.9               | 0.000191                | 16.7 ± 4.4 | 0.007965                | 28.1 ± 3.8 | 1.61 × 10 <sup>-5</sup> | 9  |
| BL25786                |                          |                         |            |                         |            |                         |    |
| Mnb <sup>1</sup>       | 22.9 ± 5.5               | 0.004315                | 10.8 ± 3.0 | 0.014565                | 10.0 ± 2.2 | 0.005673                | 9  |
| VDR35282               |                          |                         |            |                         |            |                         |    |
| Mnb <sup>2</sup>       | 9.6 ± 1.6                | 0.000101                | 13.9 ± 5.3 | 0.059316                | 8.3 ± 3.0  | 0.079648                | 15 |
| VDR107066              |                          |                         |            |                         |            |                         |    |
| MAST205                | 19.8 ± 3.3               | 0.000137                | 8.3 ± 3.6  | 0.124167                | 11.5 ± 4.5 | 0.066975                | 12 |
| VDR35100               |                          |                         |            |                         |            |                         |    |
| PI4KIIIα <sup>1</sup>  | 12.5 ± 2.6               | 0.001906                | 5.6 ± 2.2  | 0.204143                | 11.1 ± 5.3 | 0.133384                | 9  |
| VDR15993               |                          |                         |            |                         |            |                         |    |
| PI4KIIIα <sup>2</sup>  | 8.3 ± 2.1                | 0.007792                | 2.8 ± 1.8  | 0.767835                | 6.9 ± 3.0  | 0.173138                | 9  |
| VDR105614              |                          |                         |            |                         |            |                         |    |
| PP4-19C                | 12.5 ± 2.6               | 0.000817                | 2.1 ± 2.1  | 1.0                     | 16.7 ± 3.9 | 0.003262                | 12 |
| VDR25317               |                          |                         |            |                         |            |                         |    |
| inR                    | 10.4 ± 1.8               | 0.000679                | 6.9 ± 3.0  | 0.173138                | 9.7 ± 4.6  | 0.140024                | 9  |
| VDR991                 |                          |                         |            |                         |            |                         |    |
| Mipp2                  | 7.6 ± 1.4                | 0.00115                 | 8.3 ± 2.9  | 0.079648                | 11.1 ± 3.3 | 0.027233                | 9  |
| VDR14163               |                          |                         |            |                         |            |                         |    |
| Cdc2                   | 6.9 ± 1.6                | 0.006733                | 5.6 ± 3.0  | 0.32043                 | 5.6 ± 2.2  | 0.204143                | 9  |
| VDR41838               |                          |                         |            |                         |            |                         |    |

Transgenic RNAi lines were crossed to *elav<sup>CI55</sup>-GAL4; UAS-dcr2*. P-values were calculated relative to controls. The IDs (VDR3 or Bloomington [BL]) of the RNAi-lines are indicated for all genotypes. Retraction frequencies represent synaptic retractions per animal for the indicated muscle groups. *n* equals number of animals analyzed. cntr, control; m, muscle.

**Data for Fig. 2**

| Genotype                        | Retraction frequency (%) |      | P vs. cntr              | n  |
|---------------------------------|--------------------------|------|-------------------------|----|
|                                 | m1/9                     | 2/10 |                         |    |
| control                         | 1.0 ± 0.7                |      |                         | 12 |
| Neu>CK2β RNAi                   | 51.4 ± 4.0               |      | 1.69 × 10 <sup>-6</sup> | 9  |
| Muscle>CK2β RNAi                | 1.4 ± 0.9                |      | 0.767835                | 9  |
| Neu>CK2β RNAi; neu>CK2β         | 3.8 ± 1.4                |      | 0.1025                  | 10 |
| Neu>CK2β RNAi; neu>GFP          | 33.9 ± 2.8               |      | 9.59 × 10 <sup>-8</sup> | 12 |
| CK2β <sup>26-2</sup> /mbuP1     | 13.8 ± 3.0               |      | 0.002341                | 10 |
| CK2β <sup>26-2</sup> ; ubi>CK2β | 2.9 ± 1.1                |      | 0.185102                | 13 |

**Significance of rescue between genotypes as listed**

| Genotype      | P                                 |                         |
|---------------|-----------------------------------|-------------------------|
| Neu>CK2β RNAi | Neu>CK2β <sup>RNAi</sup> ; > CK2β | 5.37 × 10 <sup>-7</sup> |

| Genotype                   | Retraction frequency (%) |  | P                       | n  |
|----------------------------|--------------------------|--|-------------------------|----|
|                            | (all MARCM NMJs)         |  |                         |    |
| MARCM control              | 0.0 ± 0.0                |  |                         | 17 |
| MARCM CK2β <sup>26-2</sup> | 29.0 ± 5.0               |  | 7.24 × 10 <sup>-6</sup> | 33 |

Retraction frequencies represent retractions per animals for the indicated muscle groups. For the MARCM analysis, all mCD8-GFP-positive NMJs were evaluated. P values were calculated relative to controls or as indicated. *n* equals number of animals analyzed.

### Data for Fig. 3

| Genotype                                          | Retraction frequency (%) |      | P vs. cntr               | n  |
|---------------------------------------------------|--------------------------|------|--------------------------|----|
|                                                   | m1/9                     | 2/10 |                          |    |
| control                                           | 1.1 ± 0.8                |      |                          | 12 |
| CK2 $\alpha^{P1/P1}$                              | 57.5 ± 3.9               |      | 4.22 × 10 <sup>-10</sup> | 15 |
| CK2 $\alpha^{P1/P2}$                              | 33.0 ± 3.8               |      | 8.84 × 10 <sup>-7</sup>  | 14 |
| CK2 $\alpha^{P1/Tik}$                             | 40.1 ± 3.4               |      | 7.34 × 10 <sup>-11</sup> | 21 |
| CK2 $\alpha^{P1/TikR}$                            | 54.0 ± 5.0               |      | 7.5 × 10 <sup>-9</sup>   | 17 |
| CK2 $\alpha^{P1/P1}$ neu>CK2 $\alpha$             | 1.0 ± 0.7                |      | 0.92807                  | 12 |
| CK2 $\alpha^{P1/P1}$ neu>CK2 $\alpha$ _KD         | 65.8 ± .9                |      | 2.49 × 10 <sup>-14</sup> | 17 |
| CK2 $\alpha^{P1/P1}$ muscle>CK2 $\alpha$          | 52.5 ± 3.3               |      | 1.49 × 10 <sup>-10</sup> | 15 |
| CK2 $\alpha^{P1/P1}$ ubi>CK2 $\alpha$             | 0.7 ± 0.5                |      | 0.665861                 | 17 |
| CK2 $\alpha^{P2/P2}$ ; ubi>CK2 $\alpha$ neu>Gal80 | 41.7 ± 4.3               |      | 6.57 × 10 <sup>-6</sup>  | 9  |

### Significance of rescue between genotypes as listed

|                                                                | P                        |
|----------------------------------------------------------------|--------------------------|
| CK2 $\alpha^{P1/P1}$ CK2 $\alpha^{P1/P1}$ neu>CK2 $\alpha$     | 4.22 × 10 <sup>-10</sup> |
| CK2 $\alpha^{P1/P1}$ CK2 $\alpha^{P1/P1}$ neu>CK2 $\alpha$ _KD | 0.099286                 |
| CK2 $\alpha^{P1/P1}$ CK2 $\alpha^{P1/P1}$ muscle>CK2 $\alpha$  | 0.335885                 |
| CK2 $\alpha^{P1/P1}$ CK2 $\alpha^{P1/P1}$ ubi>CK2 $\alpha$     | 8.88 × 10 <sup>-10</sup> |

Retraction frequencies represent retractions per animals for the indicated muscle groups. P-values were calculated relative to controls or as indicated. *n* equals number of animals analyzed.

### Data for Fig. S3

| Genotype                                   | Retraction frequency (%) |      |                          |            | n                       |            |
|--------------------------------------------|--------------------------|------|--------------------------|------------|-------------------------|------------|
|                                            | m1/9                     | 2/10 | P vs. cntr               | m6/7       |                         | P vs. cntr |
| control                                    | 1.0 ± 0.7                |      |                          | 2.1 ± 1.7  |                         | 12         |
| CK2 $\alpha^{P1}$ /CK2 $\alpha^{P1}$       | 57.5 ± 3.9               |      | 4.22 × 10 <sup>-10</sup> | 53.3 ± 7.4 | 5.66 × 10 <sup>-6</sup> | 15         |
| CK2 $\alpha^{P1}$ /CK2 $\alpha^{P2}$       | 33.0 ± 3.8               |      | 8.84 × 10 <sup>-7</sup>  | 23.2 ± 4.7 | 0.000621                | 14         |
| CK2 $\alpha^{P1}$ /CK2 $\alpha^{Tik}$      | 40.1 ± 3.4               |      | 7.34 × 10 <sup>-11</sup> | 33.0 ± 5.0 | 3.62 × 10 <sup>-6</sup> | 21         |
| CK2 $\alpha^{P1}$ /CK2 $\alpha^{TikR}$     | 54.0 ± 5.0               |      | 7.5 × 10 <sup>-9</sup>   | 44.9 ± 6.0 | 1.65 × 10 <sup>-6</sup> | 17         |
| CK2 $\alpha^{P1}$ /CK2 $\alpha^{G703}$     | 36.1 ± 2.9               |      | 9.32 × 10 <sup>-7</sup>  | 27.8 ± 7.1 | 0.006451                | 9          |
| CK2 $\alpha^{P1}$ /CK2 $\alpha^{H3091}$    | 32.8 ± 4.6               |      | 1.68 × 10 <sup>-5</sup>  | 18.6 ± 4.5 | 0.003586                | 12         |
| CK2 $\alpha^{P2}$ /CK2 $\alpha^{P2}$       | Early lethal             |      |                          |            |                         |            |
| CK2 $\alpha^{P2}$ /CK2 $\alpha^{Tik}$      | 32.1 ± 2.1               |      | 1.5 × 10 <sup>-17</sup>  | 16.5 ± 2.5 | 3.85 × 10 <sup>-7</sup> | 21         |
| CK2 $\alpha^{P2}$ /CK2 $\alpha^{TikR}$     | Early lethal             |      |                          |            |                         |            |
| CK2 $\alpha^{P2}$ /CK2 $\alpha^{G703}$     | 38.6 ± 4.1               |      | 2.07 × 10 <sup>-6</sup>  | 35.2 ± 4.1 | 5.51 × 10 <sup>-6</sup> | 11         |
| CK2 $\alpha^{P2}$ /CK2 $\alpha^{H3091}$    | 21.9 ± 3.1               |      | 2.92 × 10 <sup>-5</sup>  | 12.5 ± 4.4 | 0.040278                | 12         |
| CK2 $\alpha^{Tik}$ /CK2 $\alpha^{Tik}$     | Early lethal             |      |                          |            |                         |            |
| CK2 $\alpha^{Tik}$ /CK2 $\alpha^{TikR}$    | Early lethal             |      |                          |            |                         |            |
| CK2 $\alpha^{Tik}$ /CK2 $\alpha^{G703}$    | 30.2 ± 4.9               |      | 9.66 × 10 <sup>-5</sup>  | 17.7 ± 3.9 | 0.002108                | 12         |
| CK2 $\alpha^{Tik}$ /CK2 $\alpha^{H3091}$   | 12.1 ± 2.0               |      | 6.2 × 10 <sup>-5</sup>   | 10.9 ± 3.0 | 0.014054                | 16         |
| CK2 $\alpha^{TikR}$ /CK2 $\alpha^{TikR}$   | Early lethal             |      |                          |            |                         |            |
| CK2 $\alpha^{TikR}$ /CK2 $\alpha^{G703}$   | 51.4 ± 5.4               |      | 1.5 × 10 <sup>-5</sup>   | 47.2 ± 6.2 | 5.48 × 10 <sup>-5</sup> | 9          |
| CK2 $\alpha^{TikR}$ /CK2 $\alpha^{H3091}$  | 29.9 ± 4.0               |      | 0.000103                 | 15.3 ± 4.0 | 0.01167                 | 9          |
| CK2 $\alpha^{G703}$ /CK2 $\alpha^{G703}$   | Early lethal             |      |                          |            |                         |            |
| CK2 $\alpha^{G703}$ /CK2 $\alpha^{H3091}$  | 17.4 ± 3.0               |      | 0.000115                 | 15.2 ± 2.7 | 0.000361                | 14         |
| CK2 $\alpha^{H3091}$ /CK2 $\alpha^{H3091}$ | Early lethal             |      |                          |            |                         |            |

Retraction frequencies represent retractions per animals for the indicated muscle groups. P-values were calculated relative to controls or as indicated. *n* equals number of animals analyzed.

### Data for Fig. 4

| Genotypes                                       | Retraction frequency (%) |      | P                        | n  |
|-------------------------------------------------|--------------------------|------|--------------------------|----|
|                                                 | m1/9                     | 2/10 |                          |    |
| Control                                         | 1.0 ± 0.7                |      |                          | 12 |
| CK2 $\alpha^{P1/P1}$                            | 54.4 ± 2.8               |      | 1.17 × 10 <sup>-16</sup> | 24 |
| CK2 $\alpha^{P1/P1}$ ubi>CK2 $\alpha$           | 0.7 ± 0.5                |      | 0.726453                 | 17 |
| CK2 $\alpha^{P1/P1}$ ubi>CK2 $\alpha$ _L39A     | 1.6 ± 0.7                |      | 0.684095                 | 16 |
| CK2 $\alpha^{P1/P1}$ ubi>CK2 $\alpha$ _F52A     | 2.7 ± 1.1                |      | 0.25442                  | 16 |
| CK2 $\alpha^{P1/P1}$ ubi>CK2 $\alpha$ _L39AF52A | 19.9 ± 3.4               |      | 3.64 × 10 <sup>-5</sup>  | 17 |

### Significance of rescue between genotypes as listed

|                                                                      | P                       |
|----------------------------------------------------------------------|-------------------------|
| CK2 $\alpha^{P1/P1}$ CK2 $\alpha^{P1/P1}$ ubi>CK2 $\alpha$ _L39AF52A | 2.79 × 10 <sup>-9</sup> |

Retraction frequencies represent retractions per animals for the indicated muscle groups. P-values were calculated relative to controls or as indicated. *n* equals number of animals analyzed.

**Data Fig. 5**

| Genotypes                                   | Retraction frequency (%) |                          | <i>n</i> |
|---------------------------------------------|--------------------------|--------------------------|----------|
|                                             | m1/9 2/10                | P                        |          |
| Control                                     | 1.0 ± 0.7                |                          | 12       |
| CK2 $\alpha^{P1/P1}$                        | 57.5 ± 3.9               | 4.22 × 10 <sup>-10</sup> | 15       |
| CK2 $\alpha^{P1/P1}$ neu > GFP-CK2 $\alpha$ | 1.4 ± 0.9                | 0.767835                 | 9        |

Retraction frequencies represent retractions per animals for the indicated muscle groups. P values were calculated relative to controls or as indicated. *n* equals number of animals analyzed.

**Data Fig. S4**

| Genotype              | Retraction frequency (%) |                         |            |                         |            |                         | <i>n</i> |
|-----------------------|--------------------------|-------------------------|------------|-------------------------|------------|-------------------------|----------|
|                       | m1/9 2/10                | P                       | m6/7       | P                       | m4         | P                       |          |
| Control               | 1.0 ± 0.7                |                         | 2.1 ± 1.4  |                         | 2.1 ± 1.4  |                         | 12       |
| PP2A-29B <sup>1</sup> | 48.7 ± 3.9               | 1.05 × 10 <sup>-8</sup> | 64.3 ± 5.2 | 7.62 × 10 <sup>-9</sup> | 56.7 ± 3.9 | 1.21 × 10 <sup>-9</sup> | 14       |
| VDRC49671             |                          |                         |            |                         |            |                         |          |
| PP2A-29B <sup>2</sup> | 40.0 ± 5.6               | 7.1 × 10 <sup>-5</sup>  | 47.1 ± 7.8 | 7.27 × 10 <sup>-5</sup> | 27.9 ± 5.1 | 0.000258                | 10       |
| BL29384               |                          |                         |            |                         |            |                         |          |
| DN-Mts                | 23.6 ± 4.1               | 0.000112                | 10.6 ± 2.8 | 0.013737                | 15.4 ± 4.9 | 0.021277                | 13       |

| Genotypes                                            | Retraction frequency (%) |                          | <i>n</i> |
|------------------------------------------------------|--------------------------|--------------------------|----------|
|                                                      | m1/9 2/10                | P                        |          |
| Control                                              | 1.0 ± 0.7                |                          | 12       |
| CK2 $\alpha^{P1/P1}$                                 | 54.4 ± 2.8               | 1.17 × 10 <sup>-16</sup> | 24       |
| CK2 $\alpha^{P1/Tik}$                                | 40.1 ± 3.4               | 7.34 × 10 <sup>-11</sup> | 22       |
| CK2 $\alpha^{P1/P1}$ neu > CK2 $\alpha$ _E165D       | 2.1 ± 2.1                | 0.684368                 | 6        |
| CK2 $\alpha^{P1/P1}$ neu > CK2 $\alpha$ _E165A       | 2.1 ± 1.3                | 0.551196                 | 6        |
| CK2 $\alpha^{P1/P1}$ neu > CK2 $\alpha$ _ENRK165ANAA | 1.7 ± 1.2                | 0.697549                 | 11       |
| CK2 $\alpha^{P1/P1}$ neu > CK2 $\alpha$ _M161K       | 32.8 ± 7.1               | 0.002938                 | 8        |

**Significance of rescue between genotypes as listed**

|                       | P                                              |
|-----------------------|------------------------------------------------|
| CK2 $\alpha^{P1/Tik}$ | CK2 $\alpha^{P1/P1}$ neu > CK2 $\alpha$ _M161K |
|                       | 0.376674                                       |

Retraction frequencies represent retractions per animals for the indicated muscle groups. P-values were calculated relative to controls or as indicated. *n* equals number of animals analyzed.

**Data for Fig. 6**

| Genotype                                          | Nrg-level (% control) |                         |                                 |                         |              |          | <i>n</i> |
|---------------------------------------------------|-----------------------|-------------------------|---------------------------------|-------------------------|--------------|----------|----------|
|                                                   | Distal                | P                       | Center                          | P                       | Proximal     | P        |          |
| Control                                           | 100.0 ± 14.0          |                         | 100.0 ± 5.1                     |                         | 100.0 ± 4.6  |          | 6        |
| CK2 $\alpha^{P1/TikR}$                            | 47.5 ± 2.0            | 0.013809                | 60.7 ± 5.3                      | 0.000484                | 70.0 ± 9.0   | 0.024828 | 6        |
| CK2 $\alpha^{P1/TikR}$ , neu > CK2 $\alpha$       | 86.4 ± 5.2            | 0.398193                | 101.7 ± 15.1                    | 0.919937                | 122.7 ± 10.9 | 0.127887 | 6        |
| CK2 $\alpha^{P1/TikR}$ , neu > CK2 $\alpha^{KD}$  | 46.7 ± 3.4            | 0.010084                | 56.8 ± 5.7                      | 0.000308                | 66.2 ± 5.7   | 0.001693 | 6        |
| CK2 $\alpha^{P1/TikR}$ , neu > Nrg                | 64.5 ± 11.4           | 0.080597                | 109.1 ± 19.6                    | 0.671471                | 140.0 ± 16.6 | 0.068241 | 6        |
|                                                   |                       |                         | <b>Ank2-L-level (% control)</b> |                         |              |          |          |
| Control                                           | 100.0 ± 5.3           |                         | 100.0 ± 7.6                     |                         | 100.0 ± 8.4  |          | 6        |
| CK2 $\alpha^{P1/TikR}$                            | 19.4 ± 3.0            | 9.99 × 10 <sup>-7</sup> | 59.1 ± 8.3                      | 0.00476                 | 40.5 ± 1.7   | 0.000945 | 6        |
| CK2 $\alpha^{P1/TikR}$ , neu > CK2 $\alpha$       | 126.8 ± 16.8          | 0.178839                | 134.7 ± 12.6                    | 0.046746                | 98.7 ± 9.8   | 0.922847 | 6        |
| CK2 $\alpha^{P1/TikR}$ , neu > CK2 $\alpha^{KD}$  | 22.6 ± 5.1            | 9.65 × 10 <sup>-7</sup> | 52.3 ± 6.9                      | 1.47 × 10 <sup>-5</sup> | 57.7 ± 7.1   | 0.003219 | 6        |
| CK2 $\alpha^{P1/TikR}$ , neu > Nrg                | 15.9 ± 2.1            | 5.76 × 10 <sup>-6</sup> | 58.3 ± 5.9                      | 0.001979                | 45.8 ± 4.3   | 0.000693 | 6        |
|                                                   |                       |                         | <b>Futsch-level (% control)</b> |                         |              |          |          |
| Control                                           | 100.0 ± 28.9          |                         | 100.0 ± 13.2                    |                         | 100.0 ± 15.4 |          | 6        |
| CK2 $\alpha^{P1/P1}$                              | 47.6 ± 7.8            | 0.130945                | 19.8 ± 2.6                      | 0.001876                | 22.2 ± 4.4   | 0.002798 | 7        |
| CK2 $\alpha^{P1/P1}$ , neu > CK2 $\alpha$         | 71.3 ± 8.4            | 0.377404                | 140.7 ± 15.2                    | 0.070729                | 105.3 ± 14.2 | 0.804896 | 6        |
| CK2 $\alpha^{P1/P1}$ , neu > CK2 $\alpha^{P1/P1}$ | 61.7 ± 8.2            | 0.250647                | 33.7 ± 6.3                      | 0.002651                | 35.9 ± 7.7   | 0.007312 | 6        |

neu > CK2 $\alpha$ <sup>KD</sup>

|                                 |              | DvGlut-level (% control) |              |          |              |          |    |
|---------------------------------|--------------|--------------------------|--------------|----------|--------------|----------|----|
| Control                         | 100.0 ± 4.8  |                          | 100.0 ± 2.8  |          | 100.0 ± 2.9  | 12       |    |
| CK2 $\alpha$ <sup>P1/TikR</sup> | 106.4 ± 5.1  | 0.368138                 | 111.4 ± 3.3  | 0.015368 | 110.4 ± 4.2  | 0.056714 | 12 |
|                                 |              | FasII-level (% control)  |              |          |              |          |    |
| Control                         | 100.0 ± 18.0 |                          | 100.0 ± 12.4 |          | 100.0 ± 10.8 | 6        |    |
| CK2 $\alpha$ <sup>P1/TikR</sup> | 80.1 ± 7.1   | 0.351407                 | 95.6 ± 3.8   | 0.747492 | 104.9 ± 11.5 | 0.76361  | 6  |

Analysis of protein levels at distal, central, and proximal boutons of NMJs on m4 segment A4. All genotypes were imaged with settings equivalent to the controls. Quantification was performed using Imaris (Bitplane). P-values were calculated relative to control. *n* equals number of NMJs analyzed.

| Genotype                                  | Retraction frequency (%) m1/9 2/10 | P                        | <i>n</i> |
|-------------------------------------------|------------------------------------|--------------------------|----------|
| Wild type                                 | 1.1 ± 0.7                          |                          | 12       |
| CK2 $\alpha$ <sup>P1/P1</sup>             | 57.5 ± 3.9                         | 4.49 × 10 <sup>-10</sup> | 15       |
| CK2 $\alpha$ <sup>P1/P1</sup> ; neu > Nrg | 50 ± 4.7                           | 6.55 × 10 <sup>-6</sup>  | 9        |

| Statistical comparison between genotypes as listed | P                                         |          |
|----------------------------------------------------|-------------------------------------------|----------|
| CK2 $\alpha$ <sup>P1/P1</sup>                      | CK2 $\alpha$ <sup>P1/P1</sup> ; neu > Nrg | 0.233614 |

Retraction frequencies represent retractions per animals for the indicated muscle groups. P-values were calculated relative to controls or as indicated. *n* equals number of animals analyzed.

**Data for Fig. 7**

| Genotype                                               | Retraction frequency (%) |                          |            |                          | <i>n</i> |
|--------------------------------------------------------|--------------------------|--------------------------|------------|--------------------------|----------|
|                                                        | m6/7                     | P                        | m1/9, 2/10 | P                        |          |
| control                                                | 2.1 ± 1.4                |                          | 1.0 ± 0.7  |                          | 12       |
| neu > CK2 $\alpha$                                     | 2.1 ± 1.4                | 1.0                      | 1.0 ± 0.7  | 1.0                      | 12       |
| neu > CK2 $\alpha$ <sup>KD</sup>                       | 2.1 ± 1.4                | 1.0                      | 1.6 ± 0.8  | 0.633323                 | 12       |
| ank2 <sup>P2/P2</sup>                                  | 60.8 ± 4.5               | 6.43 × 10 <sup>-10</sup> | 65.1 ± 4.2 | 4.24 × 10 <sup>-9</sup>  | 15       |
| ank2 <sup>P2/P2</sup> neu > CK2 $\alpha$               | 31.7 ± 5.4               | 0.000111                 | 45.8 ± 6.2 | 1.85 × 10 <sup>-5</sup>  | 13       |
| ank2 <sup>P2/P2</sup> neu > CK2 $\alpha$ <sup>KD</sup> | 91.7 ± 3.6               | 1.23 × 10 <sup>-12</sup> | 86.4 ± 4.0 | 3.37 × 10 <sup>-10</sup> | 12       |

| Statistical comparison between genotypes | p (m 1/9 2/10)                                         | p (m 6/7)               |                        |
|------------------------------------------|--------------------------------------------------------|-------------------------|------------------------|
| ank2 <sup>P2/P2</sup>                    | ank2 <sup>P2/P2</sup> neu > CK2 $\alpha$               | 0.00039                 | 0.019175               |
| ank2 <sup>P2/P2</sup>                    | ank2 <sup>P2/P2</sup> neu > CK2 $\alpha$ <sup>KD</sup> | 1.53 × 10 <sup>-5</sup> | 0.001555               |
| ank2 <sup>P2/P2</sup> neu > CK2 $\alpha$ | ank2 <sup>P2/P2</sup> neu > CK2 $\alpha$ <sup>KD</sup> | 1.14 × 10 <sup>-8</sup> | 2.8 × 10 <sup>-5</sup> |

Retraction frequencies represent retractions per animals for the indicated muscle groups. P-values were calculated relative to controls or as indicated. *n* equals number of animals analyzed.

| Genotype                                              | Retraction frequency (%) |                         | <i>n</i> |
|-------------------------------------------------------|--------------------------|-------------------------|----------|
|                                                       | m6/7                     | P                       |          |
| Control (second instar)                               | 1.8 ± 1.2                |                         | 11       |
| ank2 <sup>null</sup>                                  | 36.4 ± 2.9               | 5.01 × 10 <sup>-9</sup> | 10       |
| ank2 <sup>null</sup> neu > CK2 $\alpha$               | 34.1 ± 4.0               | 1.92 × 10 <sup>-7</sup> | 11       |
| ank2 <sup>null</sup> neu > CK2 $\alpha$ <sup>KD</sup> | 41.1 ± 4.3               | 3.31 × 10 <sup>-8</sup> | 12       |

| Statistical comparison between genotypes | p (m 6/7)                                             |       |
|------------------------------------------|-------------------------------------------------------|-------|
| ank2 <sup>null</sup>                     | ank2 <sup>null</sup> neu > CK2 $\alpha$               | 0.648 |
| ank2 <sup>null</sup>                     | ank2 <sup>null</sup> neu > CK2 $\alpha$ <sup>KD</sup> | 0.393 |
| ank2 <sup>null</sup> neu > CK2 $\alpha$  | ank2 <sup>null</sup> neu > CK2 $\alpha$ <sup>KD</sup> | 0.248 |

Retraction frequencies represent retractions per animals for the indicated muscle groups. P-values were calculated relative to controls or as indicated. *n* equals number of animals analyzed.

| Genotype                                            | Retraction frequency (%) |                         |            |                          | <i>n</i> |
|-----------------------------------------------------|--------------------------|-------------------------|------------|--------------------------|----------|
|                                                     | m6/7                     | P                       | m1/9, 2/10 | P                        |          |
| control                                             | 2.1 ± 1.4                |                         | 1.0 ± 0.7  |                          | 12       |
| CK2 $\alpha$ <sup>P1/+</sup>                        | 2.1 ± 1.4                | 1.0                     | 1.0 ± 0.7  | 1.0                      | 12       |
| Ank2 <sup>P2/+</sup>                                | 3.1 ± 1.7                | 0.633323                | 1.6 ± 0.8  | 0.633323                 | 12       |
| CK2 $\alpha$ <sup>P1/+</sup> ; ank2 <sup>P2/+</sup> | 3.1 ± 1.7                | 0.633323                | 1.6 ± 0.8  | 0.633323                 | 12       |
| CK2 $\alpha$ <sup>P1/P1</sup>                       | 52.4 ± 5.7               | 1.84 × 10 <sup>-8</sup> | 58.2 ± 3.2 | 1.82 × 10 <sup>-13</sup> | 21       |

|                                    |                |                        |                |                        |    |
|------------------------------------|----------------|------------------------|----------------|------------------------|----|
| CK2 $\alpha^{P1/P1}$ ; ank2 $P2/+$ | 77.3 $\pm$ 5.0 | 5.89 $\times 10^{-9}$  | 82.4 $\pm$ 3.1 | 4.17 $\times 10^{-11}$ | 11 |
| ank2 $P2/P2$                       | 60.8 $\pm$ 4.5 | 6.43 $\times 10^{-10}$ | 65.1 $\pm$ 4.2 | 4.24 $\times 10^{-9}$  | 15 |
| ank2 $P2/P2$ ; CK2 $\alpha^{P1/+}$ | 87.5 $\pm$ 4.5 | 1.47 $\times 10^{-11}$ | 91.1 $\pm$ 3.0 | 5.54 $\times 10^{-14}$ | 14 |

| Statistical comparison between genotypes |                                    | p (m 1/9 2/10) | p (m 6/7)             |
|------------------------------------------|------------------------------------|----------------|-----------------------|
| CK2 $\alpha^{P1/P1}$                     | CK2 $\alpha^{P1/P1}$ ; ank2 $P2/+$ | 0.002686       | 1.31 $\times 10^{-5}$ |
| ank2 $P2/P2$                             | CK2 $\alpha^{P1/+}$ ; ank2 $P2/P2$ | 0.000295       | 6.8 $\times 10^{-5}$  |

Retraction frequencies represent retractions per animals for the indicated muscle groups. P-values were calculated relative to controls or as indicated. *n* equals number of animals analyzed.

#### Data for Fig. 8

| Genotype                                    | Bouton number m4 (absolute) | Bouton number m4 (% control) | P                      | n  |
|---------------------------------------------|-----------------------------|------------------------------|------------------------|----|
| Control                                     | 17.2 $\pm$ 0.5              | 100 $\pm$ 3.2                |                        | 64 |
| CK2 $\alpha^{P1/P1}$                        | 11.8 $\pm$ 0.4              | 68.9 $\pm$ 2.5               | 7.1 $\times 10^{-11}$  | 64 |
| CK2 $\alpha^{P1/P1}$ neu > CK2 $\alpha$     | 19.7 $\pm$ 0.7              | 114.4 $\pm$ 4.0              | 0.002495               | 64 |
| CK2 $\alpha^{P1/P1}$ neu > CK2 $\alpha$ _KD | 11.2 $\pm$ 0.5              | 65.4 $\pm$ 2.9               | 1.08 $\times 10^{-12}$ | 64 |
| neu $^{elav; dcr2}$ > CK2 $\beta^{RNAi}$    | 14.3 $\pm$ 0.4              | 83.1 $\pm$ 2.6               | 3.2 $\times 10^{-5}$   | 64 |

| Significance of rescue between genotypes as listed |                                           | P                      |
|----------------------------------------------------|-------------------------------------------|------------------------|
| CK2 $\alpha^{P1/P1}$                               | CK2 $\alpha^{P1/P1}$ neu>CK2 $\alpha$     | 2.57 $\times 10^{-15}$ |
| CK2 $\alpha^{P1/P1}$                               | CK2 $\alpha^{P1/P1}$ neu>CK2 $\alpha$ _KD | 0.424474               |

The number of type Ib boutons on muscle 4 was quantified. P-values were calculated relative to controls or as indicated. *n* equals number of NMJs analyzed.

| Genotype                                    | DvGlut cluster m4 (absolute) | DvGlut cluster m4 (% control) | P                      | n  |
|---------------------------------------------|------------------------------|-------------------------------|------------------------|----|
| control                                     | 100 $\pm$ 4.0                | 58.3 $\pm$ 2.3                |                        | 48 |
| CK2 $\alpha^{P1/P1}$                        | 40.8 $\pm$ 2.8               | 23.8 $\pm$ 1.5                | 1.11 $\times 10^{-20}$ | 48 |
| CK2 $\alpha^{P1/P1}$ neu > CK2 $\alpha$     | 99.9 $\pm$ 4.2               | 58.2 $\pm$ 2.5                | 0.985266               | 48 |
| CK2 $\alpha^{P1/P1}$ neu > CK2 $\alpha$ _KD | 38.0 $\pm$ 2.5               | 22.1 $\pm$ 1.4                | 6.93 $\times 10^{-22}$ | 48 |
| neu $^{2x}$ > CK2 $\alpha$ /CK2 $\alpha$    | 170.9 $\pm$ 5.5              | 99.5 $\pm$ 3.2                | 7.89 $\times 10^{-17}$ | 48 |
| neu $^{elav; dcr2}$ > CK2 $\beta^{RNAi}$    | 60.9 $\pm$ 3.2               | 35.5 $\pm$ 1.9                | 2.01 $\times 10^{-11}$ | 48 |

| Statistical comparison between genotypes as listed |                                           | P                      |
|----------------------------------------------------|-------------------------------------------|------------------------|
| CK2 $\alpha^{P1/P1}$                               | CK2 $\alpha^{P1/P1}$ neu>CK2 $\alpha$     | 3.76 $\times 10^{-19}$ |
| CK2 $\alpha^{P1/P1}$                               | CK2 $\alpha^{P1/P1}$ neu>CK2 $\alpha$ _KD | 0.429068               |

The number of DvGlut clusters per muscle 4 NMJ was quantified. P-values were calculated relative to controls or as indicated. *n* equals number of NMJs analyzed.

| Genotype                       | Satellite bouton number (m4) | P                     | n  |
|--------------------------------|------------------------------|-----------------------|----|
| control                        | 0.6 $\pm$ 0.2                |                       | 20 |
| neu>CK2 $\alpha$ /CK2 $\alpha$ | 20.5 $\pm$ 2.4               | 1.38 $\times 10^{-7}$ | 20 |

The number of satellite boutons per muscle 4 NMJ was quantified. P-values were calculated relative to controls or as indicated. *n* equals number of NMJs analyzed.
